# Supplementary material for: Advances of hydrogel combined with stem cells in promoting chronic wound healing
Source: PubMed Central journal article supplement (PMC9742286; doi:10.3389/fchem.2022.1038839), 2022-11-28
Supplement: DataSheet1.pdf [file DataSheet1.pdf]

## Supplementary Material

### Supplementary Figures

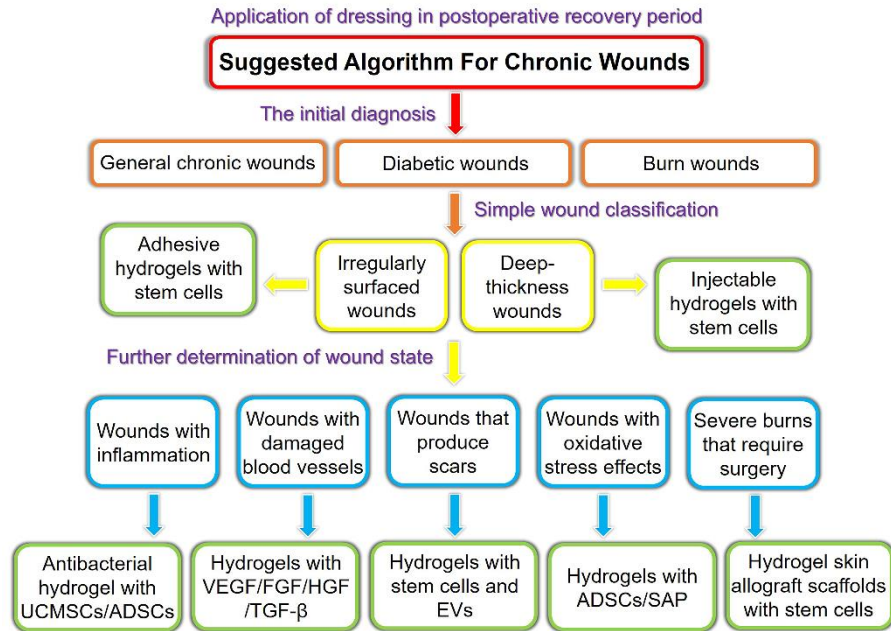

**Supplementary Figure 1.** Suggested algorithm for hydrogel-stem cells treatment to promote chronic wound healing.

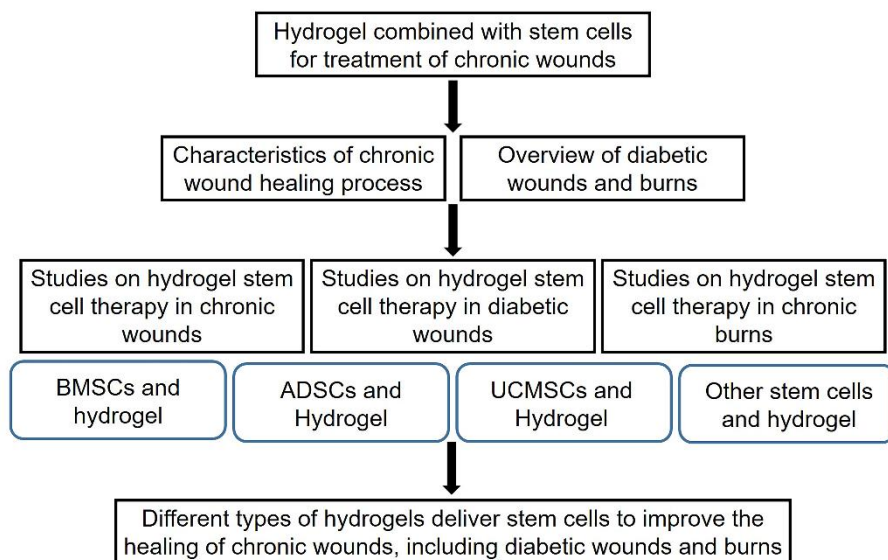

**Supplementary Figure 2.** Flow chart of the structure of the review.
